## Effects of $\alpha$ -crystallin gene knockout on zebrafish lens development

Mason Posner<sup>1</sup>, Kelly L. Murray<sup>1</sup>, Brandon Andrew<sup>1</sup>, Stuart Brdicka<sup>1</sup>, Alexis Butterbaugh-Roberts<sup>1</sup>,  
Kirstan Franklin<sup>1</sup>, Adil Hussien<sup>1</sup>, Taylor Kaye<sup>1</sup>, Emmaline Kepp<sup>1</sup>, Mathew S. McDonald<sup>1</sup>, Tyler Snodgrass<sup>1</sup>,  
Keith Zientek<sup>2</sup> and Larry David<sup>2</sup>

<sup>1</sup>Department of Biology and Toxicology, Ashland University, Ashland, OH

<sup>2</sup>Department of Biochemistry and Molecular Biology, Oregon Health and Science University

Correspondence to:

Mason Posner  
Ashland University, Department of Biology and Toxicology  
401 College Avenue, Ashland, OH 44805  
Phone: (419) 289-5691  
email: mposner@ashland.edu

### Abstract

The  $\alpha$ -crystallin small heat shock proteins contribute to the transparency and refractive properties of the vertebrate eye lens and prevent the protein aggregation that would otherwise produce lens cataract, the leading cause of human blindness. There are conflicting data in the literature as to what role the  $\alpha$ -crystallins may play in early lens development. In this study we used CRISPR gene editing to produce zebrafish lines with null mutations for each of the three  $\alpha$ -crystallin genes (*cryaa*, *cryaba* and *cryabb*). Absence of protein was confirmed by mass spectrometry and lens phenotypes were assessed with differential interference contrast microscopy and histology. Loss of  $\alpha$ A-crystallin produced a variety of lens defects with varying severity in larval lenses at 3 and 4 dpf, but little significant change in normal fiber cell denucleation. Loss of either  $\alpha$ Ba- or  $\alpha$ Bb-crystallin produced no significant lens defects. Mutation of each  $\alpha$ -crystallin gene did not alter the expression levels of the remaining two, suggesting a lack of genetic compensation. These data confirm a developmental role for  $\alpha$ A-crystallin in lens development, but the range of phenotype severity suggests its loss simply increases the chance for defect, and that the protein is not essential. Our finding that *cryaba* and *cryabb* null mutants lack noticeable lens defects is congruent with insignificant transcript levels in lens epithelial and fiber cells. Future experiments can explore the molecular consequences of *cryaa* mutation and causes of lens defects in this null mutant, as well as the roles of other genes in lens development and function.

## 42 Introduction

43

44 Alpha crystallins are small heat shock proteins that contribute to the high protein density that  
45 produces the refractive power of the vertebrate eye lens (Horwitz, 1992). Because of their ability to  
46 bind denaturing proteins and block aggregation,  $\alpha$ -crystallins are thought to prevent lens cataract, the  
47 leading cause of human blindness worldwide. Their expression in tissues outside the eye, especially the  
48 broadly expressed  $\alpha$ B-crystallin, also suggests that they may play diverse physiological roles  
49 (Srinivasan, Nagineni & Bhat, 1992). Numerous studies link  $\alpha$ B-crystallin to the physiology and disease  
50 of muscular and nervous tissue (Bova et al., 1999).

51

52 Zebrafish have been a valuable model for investigating lens crystallin function. Zebrafish and human  
53 lenses are made of similar proteins, and the mechanisms underlying their development are conserved  
54 (Posner et al., 2008; Greiling, Aose & Clark, 2010). The production of large numbers of transparent  
55 embryos and the ease with which zebrafish can be genetically manipulated makes them a good tool for  
56 examining crystallin function. The presence of two  $\alpha$ B-crystallin paralog genes in zebrafish provides an  
57 opportunity to dissect the roles of this multi-functional single mammalian protein (Smith et al., 2006).  
58 The accessibility of early-stage embryos and fast development times make zebrafish ideal for studying  
59 the roles of  $\alpha$ -crystallins in early lens development. These studies in zebrafish are more convenient and  
60 much less costly than in mammalian systems such as mouse.

61

62 Various genetic knockout and translation blocking techniques have been used to investigate the  
63 impacts of  $\alpha$ -crystallin loss on zebrafish lens development. These experiments showed that loss of any  
64 of the three  $\alpha$ -crystallin genes produced lens defects in 3 and 4 day old fish (Zou et al., 2015; Mishra et  
65 al., 2018). This result differed from work in mouse, which showed that while the loss of  $\alpha$ A-crystallin  
66 led to reduced lens size and early cataract development, the loss of  $\alpha$ B-crystallin did not produce a lens  
67 phenotype, although heart defects were found (Brady et al., 1997, 2001). Furthermore, our recent  
68 analysis of zebrafish gene expression at single cell resolution indicated that neither of the two  $\alpha$ B-  
69 crystallin genes were expressed in the lens at significant levels through five days of development  
70 (Farnsworth, Posner & Miller, 2021). Therefore, there seems to be conflicting reports on what role, if  
71 any,  $\alpha$ B-crystallins play in early lens development.

72

73 In this present study we examine the larval lens in newly generated knockout lines for all three  
74 zebrafish  $\alpha$ -crystallin genes. The resulting data address open questions about what effect, if any, the  
75 loss of either  $\alpha$ B-crystallin protein will have on lens development. We also provide a more detailed  
76 analysis of lens phenotypes after  $\alpha$ A-crystallin loss and compare several approaches for producing  
77 gene knockouts using CRISPR editing. This data analysis can provide a set of best practices for future  
78 studies of lens gene function.

79

## 80 **Materials and Methods**

81

### 82 *Fish maintenance*

83 The use of zebrafish in this study was approved by Ashland University's Animal Use and Care  
84 Committee (approval #MP 2019-1). Fish were maintained on a recirculating aquarium system at  
85 approximately 28°C with a 14:10 light and dark cycle with daily water changes. Juveniles and adults  
86 were fed twice each day with a combination of dry flake food and live *Artemia* cultures. Adults were  
87 bred in separate false bottom tanks to collect fertilized eggs, which were incubated in petri dishes with  
88 system water at 28°C. Resulting larvae that were to be raised to adulthood were fed a liquid slurry of  
89 ground zooplankton and green algae until large enough to eat flake food and *Artemia*.

90

### 91 *Guide RNA design, production and injection*

92 Target regions for the guide RNA (gRNA) used in single and double injections were identified using the  
93 CRISPR design tool in the *Benchling* digital notebook system ([www.benchling.com](http://www.benchling.com)). The target regions  
94 for the four-gRNA mix used with *cryaa* were identified by Wu et al. 2018 (Wu et al., 2018). Sequences  
95 for all gRNA primers are shown in Supplemental Table 1. Guide RNAs were produced using a PCR-based  
96 plasmid-free approach that annealed and elongated a universal scaffold primer with one, two or four  
97 additional primers containing the sequence of the target region. Equimolar amounts of universal  
98 scaffold primer and target region primers were used with Q5 DNA polymerase (NEB). Cycling  
99 parameters included a touchdown PCR protocol: initial 94°C denaturation for 5 min; cycle parameters:  
100 94°C for 20 sec, 65° for 20 sec, 68°C for 15 sec (13 additional cycles with extension temperature  
101 reduced 0.5°C per cycle); 30 additional cycles of: 94°C for 20 sec, 58°C for 20 sec, 68°C for 15 sec; final  
102 extension 68°C for 5 minutes. Resulting PCR product was purified with the Monarch PCR and DNA  
103 Cleanup Kit (NEB) with elution in 20 microliters nuclease free water. Up to 1000 ng of purified PCR  
104 product was used with the HighScribe T7 kit (NEB) and incubated overnight at 37°C and reaction was  
105 purified with the Monarch RNA Cleanup Kit (500 micrograms) with elution in 50 µl nuclease free water  
106 (NEB). Quality of the gRNA prep was confirmed by agarose gel.

107

108 Each injection mix contained 250 ng/µl total of the purified gRNAs and 500 ng/µl of recombinant Cas9  
109 protein (PNA Bio) with 0.2% phenol red in nuclease free water. One nanoliter of mix was microinjected  
110 with a single 20 millisecond pulse into the cytoplasm of each zebrafish zygote using a Harvard  
111 Apparatus PL-90 picoinjector (Holliston, MA).

112

### 113 *Identification of null lines*

114 Embryos injected with single or double gRNAs were genotyped after at least two months of age. Fish  
115 were anesthetized in 0.016% tricaine methane sulfonate (MS-222) resuspended in trisma base and the  
116 posterior edge of the fin was removed with scissors. Fish were kept separated for recovery and while  
117 genotyping took place. Genomic DNA was collected from each fin clip using the Monarch Genomic DNA  
118 Purification kit (New England Biolabs) and amplified with PCR primers that flanked the gRNA targeted  
119 region using OneTaq 2X Master Mix (NEB). The recommended PCR protocol was followed, with  
120 appropriate annealing temperatures determined experimentally. All primers and annealing  
121 temperatures are shown in Supplemental Table 1. Amplified genomic DNA targeted with one gRNA  
122 was sequenced to determine whether more than one sequence was apparent beginning at the target

123 area. Mutated genomic regions targeted with two gRNAs could be identified directly by the size of the  
124 resulting PCR product.

125

126 Fish resulting from injected zygotes (founder fish) determined through fin clipping to contain mutant  
127 alleles were outcrossed to wildtype fish. Ten resulting embryos were combined and homogenized to  
128 purify genomic DNA and the targeted gene region amplified to determine if the parent founder fish  
129 had passed on mutant alleles to offspring. If offspring were found to be heterozygous for a gene  
130 mutation, larvae were raised another two months for fin clipping. For single gRNA injected fish,  
131 sequencing of the heterozygotes was done to determine if the resulting mutation would cause a frame  
132 shift and early stop codon. Multiple heterozygotes with the same identified frame shift mutation were  
133 incrossed to produce null individuals that were then used to produce null lines. For double gRNA  
134 injected embryos, sequencing was used to identify heterozygotes with the same deletion, which were  
135 then incrossed to generate a null line.

136

### 137 *Proteomic assessment of knockout fish*

138 A detailed protocol outlining the sample preparation of zebrafish lenses to detect the presence of  $\alpha$ -  
139 crystallins was previously published (Posner et al., 2017). Briefly, 50  $\mu\text{g}$  portions of protein derived  
140 from either one or two dissected lenses were digested overnight with trypsin in the presence of  
141 ProteaseMax™ detergent as recommended by the manufacturer (ProMega, Madison, WI, USA). One  
142  $\mu\text{g}$  of each tryptic digest was then injected at 10  $\mu\text{l}/\text{min}$  onto a Symmetry C18 peptide trap (Waters  
143 Corporation, Milford, MA, USA) for 0-5 min using a 98% water, 2% acetonitrile (ACN), 0.1% formic acid  
144 mobile phase, then switched onto a 75  $\mu\text{m}$  x 250 mm NanoAcquity BEH 130 C18 column (Waters  
145 Corporation) using mobile phases water (A) and ACN (B) each containing 0.1% formic acid, and  
146 peptides separated using a 7.5-30% ACN over 5-35 min, 30-98% from 35-36 min, 98% ACN from 36-41  
147 min, 98-2% ACN from 41-42 min, and 2% ACN from 41-60 min at a 300 nL/min flow rate. Eluent was  
148 analyzed using a Q-Exactive HF mass spectrometer using electrospray ionization with a Nano Flex Ion  
149 Spray Source fitted with a 20  $\mu\text{m}$  stainless steel nano-bore emitter spray tip and 1.0 kV source voltage  
150 (ThermoFisher Scientific, San Jose, CA, USA). Xcalibur version 4.0 was used to control the system.  
151 Survey mass spectra were acquired over  $m/z$  400–1050 at 120,000 resolution, automatic gain control  
152 (AGC) target  $3 \times 10^6$ , maximum ion time (MIT) of 200 ms, profile mode, and lock mass correction using  
153  $m/z = 445.12002$  and  $391.28429$  polysiloxane ions. Parallel reaction monitoring (PRM) was also  
154 performed using a list of 39 precursors from  $\alpha\text{A}$ ,  $\alpha\text{Ba}$ , and  $\alpha\text{Bb}$  zebrafish crystallin peptides, as well as  
155  $\alpha$ -spectrin to assess column loading. A loop count was set to repeat precursor scans every 10 PRM  
156 scans. PRM scans were performed at 15,000 resolution, AGC target  $2 \times 10^5$ , MIT of 100 ms, normalized  
157 collision energy of 27, and isolation width of 2  $m/z$ . Results were processed using Skyline Software  
158 version 21.1.0.278 (Pino et al., 2020) using a previously constructed spectral library generated by a  
159 data-dependent MS/MS experiment from a wild type zebrafish lens digest (Posner et al., 2017). The  
160 relative abundance was determined by comparison of 4 peptides with the strongest intensities from  
161 each of the proteins. (Peptides and precursor masses listed in Supplemental Table 2).

162

### 163 *Phenotype assessment*

164 Embryos produced by incrossing the null lines were treated in 0.2 mM PTU in system water between 6  
165 and 20 hours post fertilization to maintain transparency. The gross anatomy of each larva was imaged  
166 at 45 total magnification on a dissecting microscope while one of their lenses was imaged at 200X total

167 magnification using differential interference microscopy on an Olympus IX71 microscope. Images were  
168 taken with SPOT cameras and were cropped and oriented using ImageJ (NIH). Lens diameters were  
169 measured in ImageJ with a line spanning the lens equator, which differs from the anterior-posterior  
170 dimension (Wang et al., 2020). Body lengths were measured from the tip of the snout to the end of the  
171 axial skeleton. Any statistically significant differences in measurements between genotypes was  
172 calculated using the *anova* and *TukeyHSD* functions in R (R Core Team, 2021) within RStudio (RStudio  
173 Team, 2020).

174

175 Larvae were anesthetized and then transferred to 4% paraformaldehyde with 5% sucrose for storage at  
176 4°C until cryosectioning and DAPI staining to observe the presence of lens cell nuclei. The sectioning  
177 procedure has been previously reported (Posner et al., 2013). Resulting slides with 10 micron lens  
178 sections were mounted using Vectashield Antifade Mounting Medium with DAPI (Vector Laboratories)  
179 and imaged on an Olympus IX71 microscope. DAPI intensity across the diameter of the lens was  
180 measured using the Concentric Circles plugin for ImageJ. An oval was drawn matching lens shape and  
181 10 concentric circles were used to quantify average pixel intensity along the perimeter of each circle.  
182 Any statistically significant differences in average pixel intensity between genotypes at each circle was  
183 calculated with a Mann-Whitney U test in R. All scripts and data used for this and other analyses in this  
184 study can be found in this repository on GitHub: [github.com/masonfromohio/alpha-crystallin-CRISPR-](https://github.com/masonfromohio/alpha-crystallin-CRISPR-Rscripts)  
185 [Rscripts](https://github.com/masonfromohio/alpha-crystallin-CRISPR-Rscripts)

186

#### 187 *Quantitative PCR analysis of alpha crystallin expression*

188 The qPCR methods were designed to meet MIQE guidelines (Bustin et al., 2009) and followed methods  
189 previously described (Posner et al., 2017). Larvae were collected at 7 dpf and stored in RNAlater  
190 (Thermo) at 4°C for up to one month until used for purification of total RNA with the Monarch Total  
191 RNA Miniprep Kit (NEB). Five larvae were used for each RNA purification and homogenized in DNA/RNA  
192 protection buffer with a glass homogenizer prior to proteinase K digestion, following the kit protocol.  
193 DNase treatment was performed in the RNA purification column, with a final elution in 50 µl of  
194 nuclease free water. The concentration of collected RNA was measured in a Nanodrop One (Thermo  
195 Fisher). The ProtoScript II First Strand cDNA Synthesis Kit (NEB) was used with 600 ng of total RNA from  
196 each sample with the d(T)23 VN primer using the standard protocol and -RT controls were included.

197

198 Luna Universal qPCR Master Mix (NEB) was used to amplify 1.5 µl of each cDNA sample in a 20 µl total  
199 reaction using the manufacturer's standard protocol on an Applied Biosystems StepOne Real-Time PCR  
200 System (Thermo). Three technical replicates were used for each cDNA sample, while two technical  
201 replicates were used with all -RT and non template controls (water). Two endogenous control primer  
202 sets were included (*rp/13a* and *ef1a*). All primer sequences and previously calculated efficiencies are  
203 shown in Table 2 of (Posner et al., 2017). Reactions included primers at a final concentration of 250 nM  
204 with the following parameters: hold at 95°C for 1 min; 40 cycles of 95°C for 15 s and 60°C for 30 s; fast  
205 ramp setting. Melt curve analysis was used to confirm that single products were produced, and  
206 amplification products had previously been sequenced to confirm their expected identity (Posner et al.,  
207 2017). Analysis of resulting Cq values was identical to the process previously reported (Posner et al.,  
208 2017).



## 209 Results

210

211 *Disruption of cryaa produced several types of lens defects that ranged in severity*

212 We used two approaches to mutate the zebrafish *cryaa* gene to prevent the production of  $\alpha$ A-  
213 crystallin protein. First, we injected a single guide RNA (gRNA) to produce frame shift mutations and an  
214 early stop codon (Fig 1A). This approach successfully produced a 5 base pair deletion and early stop  
215 codon after the leucine residue in position 27 (Fig 1B). Mass spectrometry confirmed that this mutant  
216 prevented the production of any measurable  $\alpha$ A-crystallin protein, as shown by the absence of  $\alpha$ A-  
217 crystallin peptide 52-65 in the *cryaa*  $-/-$  lens (Fig 1C, right). Three additional  $\alpha$ A-crystallin peptides that  
218 were monitored were also missing in *cryaa*  $-/-$  lens (Supplemental Fig. 3B-D). Differential interference  
219 contrast (DIC) microscopy of anesthetized and PTU treated larvae at 3 days post fertilization (dpf)  
220 showed that *cryaa* homozygous null fish (*cryaa*<sup>-/-</sup>) had lens irregularities. These phenotypes included a  
221 central roughness and disorganization of central fiber cells compared to wildtype controls (Fig 1 D-F).  
222 Because this original *cryaa* null line stopped breeding, we produced a second null line by using two  
223 gRNAs to produce an 863 bp deletion that removed a portion of the *cryaa* promoter and start codon  
224 region (Fig 2A). This approach made it simpler to identify mutants by PCR (Fig 2B) and reduced the  
225 potential for genetic compensation due to mutant mRNA degradation, as no truncated mRNA would be  
226 produced (El-Brolosy et al., 2019). The resulting *cryaa* null line bred well and all further data presented  
227 are from these fish.

228

229 A significant proportion of *cryaa* null larvae had lenses that appeared similar to those of wildtype fish  
230 (Fig 2C). Others showed phenotypes that we classified into five categories. Some lenses had central  
231 roughness that appeared as many small darker spots in the region of the primary fiber cells (Fig 2D).  
232 Some lenses contained elongated roughened areas that appeared to trace the edges of fiber cell  
233 boundaries (Fig 2 D and E, black arrows). We also found lenses with a disorganization of central fiber  
234 cells (Fig 2 E and F). These lenses did not show the regular circular rings of central fiber cells. Some  
235 lenses showed more severe boundaries between fiber cells, possibly at the interface between the lens  
236 nucleus and cortex (Fig 2G, black arrows), and some lenses exhibited large pits (Fig 2H).

237

238 *Frame shift mutations of the two paralogs for zebrafish  $\alpha$ B-crystallin genes did not produce noticeable*  
239 *lens defects*

240 Single gRNAs were designed to target exon 1 in both the *cryaba* and *cryabb* genes (Fig 3). Injected  
241 embryos were raised and those with mutations leading to frameshifts and early stop codons were  
242 identified. A single basepair deletion in *cryaba* led to altered amino acid sequence after residue 14 and  
243 a stop codon at residue 65 (Fig 3B). Mass spectrometry indicated that lenses from *cryaba* homozygous  
244 mutant adults expressed no detectable  $\alpha$ Ba-crystallin, as evidenced by missing tryptic peptide 11-21 in  
245 the mutant lens (Fig 3C, right). An 8 bp deletion in *cryabb* produced altered amino acids after residue 9  
246 and a stop codon at residue 26 (Fig 3D & E). Digests of adult *cryabb* homozygous null fish lens had  
247 undetectable levels of peptide 45-57 (Fig 3F, right). While minor amounts of other *cryaba* and *cryabb*  
248 peptides from null fish lenses were sometimes detected, these were attributed to carry-over on the  
249 liquid chromatography column from prior analysis of wildtype lenses (Supplemental Fig. 1: G-I and J-L).

250

251 The prevalence of lens defects in larvae generated by our *cryaa*, *cryaba* and *cryabb* null lines was  
252 quantified at 3 and 4 dpf to assess the impacts of loss of each  $\alpha$ -crystallin on lens development (Fig 4).  
253 The least common defect, but a characteristic one in *cryaa* null larvae, was the presence of visual  
254 roughness in the center of the lens. A more common defect, but most prevalent after *cryaa* loss, was a  
255 defect seen in peripheral fiber cells that appeared as a widening of the normally tight boundary  
256 between these cells. This peripheral fiber cell defect was more common at 4 dpf in both *cryaa* null  
257 larvae and larvae directly observed after injecting embryos with a four-guide RNA mix (pgRNA). Two  
258 other defect types: a disorganization of central lens and severe boundaries between fiber cells, all  
259 occurred in some wildtype lenses, but were more common in *cryaa* homozygous null larvae. Pitting in  
260 the lens was the most common defect seen in wildtype larvae and not noticeably increased after *cryaa*  
261 loss. All defect types were seen in *cryaba* and/or *cryabb* null larvae, but at much reduced proportions  
262 compared to *cryaa* null larvae, and at levels similar to wildtype larvae. When pooling all defects  
263 together, over 60% of *cryaa* null larvae showed some defect, whereas *cryaba* and *cryabb* null larvae  
264 showed below 20%, similar to wildtype larvae.

265  
266 All larvae used to assess lens phenotype were measured to record body length and lens diameter at 3  
267 and 4 dpf (Fig 5). These data show an increase in body length from 3 to 4 dpf in all genotypes, as would  
268 be expected. Body length was more varied between two independent wildtype samples than between  
269 wildtype and null samples, suggesting that gene knockout did not alter overall fish growth rate  
270 compared to wildtypes. There appeared to be little to no difference in lens diameter between 3 and 4  
271 dpf samples, which produced a decrease in the lens to body length ratio between those two timepoints  
272 for all genotypes. The only measurement that was statistically different from both wildtype samples  
273 was the lens diameter of *cryabb* knockout larvae at 4 dpf.

#### 274 275 *Loss of $\alpha$ -crystallins did not disrupt fiber cell denucleation*

276 Fiber cells of the zebrafish lens elongate and lose their nuclei between 2 and 3 dpf. We examined  
277 lenses histologically at 3 and 4 dpf to determine if this process was altered by loss of each  $\alpha$ -crystallin  
278 (Fig 6). Wildtype lenses showed that the details of this process can vary, but that the majority of lenses  
279 have cleared all nuclei from central fiber cells, leaving elongated nuclei at the posterior margin (Fig 6A,  
280 white boxes). We consistently found two posterior zones of extended fiber cells bordering a  
281 denucleated space between them (Fig 6A, asterisk), with what appeared to be a single layer of nuclei  
282 adjacent to the retinal neurons. Lenses contained rings of DAPI staining just anterior to the remaining,  
283 elongated fiber cells and extending forward with a gap between the anterior margin and the epithelial  
284 fiber cells (Fig 6A, white arrows). The posterior-most gap between elongated fiber cells was a good  
285 indicator that sections imaged were through the equator of the lens. Elongated fiber cell nuclei in  
286 wildtype lenses ranged from flat to wavy, and occasionally retained an oval shape (Fig 6C, white  
287 arrow). At 4 dpf the posterior fiber cell nuclei stacks appeared thinner and the DAPI rings less common.

288  
289 The lenses of *cryaa* null 3 dpf larvae also varied in phenotype. However, more abnormal phenotypes  
290 were seen. A small number of *cryaa* null lenses retained fiber cell nuclei deep to the central DAPI  
291 staining ring (Fig 6 I and J) or on the ring itself (Fig 6H). Quantitation of pixel intensity also showed that  
292 some *cryaa* null larval lenses had higher amounts of DAPI staining material in the deeper parts of the  
293 cortex and lens nucleus, but the mean pixel intensity did not differ statistically from wildtype larvae  
294 (Fig 6N). None of the 4 dpf *cryaa* null larvae examined retained abnormal fiber cell nuclei. None of the

295 *cryaba* or *cryabb* 3 dpf larvae examined showed retained fiber cell nuclei within the central lens  
296 (Supplemental Figure 2). However, some lenses did appear to have thicker fiber cell nuclei stacks, and  
297 possibly more oval nuclei, although these features were also seen in some wildtype lenses as described  
298 above.

299

300 *CRISPR deletion of each  $\alpha$ -crystallin gene did not alter expression of the other two*

301 Quantitative PCR (qPCR) was used to measure  $\alpha$ -crystallin gene expression levels in wildtype and our  
302 knockout lines. This allowed us to determine if mutation led to a decrease in mRNA levels for the  
303 damaged gene or changes in expression of the other  $\alpha$ -crystallin genes. Whole larvae were assessed at  
304 7 dpf as earlier work showed low levels of *cryaba* and *cryabb* expression through 4 and 5 dpf,  
305 respectively (Posner et al., 2017), and almost no expression in the lens (Farnsworth, Posner & Miller,  
306 2021). We found reduced levels of *cryaa* mRNA in 7 dpf homozygous null mutants with the large  
307 deletion removing the proximal promoter and start codon (Fig 7A). Expression levels of *cryaa* did not  
308 increase in *cryaba* and *cryabb* null larvae compared to wildtype larvae (Fig 7A). The *cryaba* and *cryabb*  
309 null lines were not produced by deleting the promoter and start codon, but instead were produced  
310 with a single gRNA producing frame shift mutations and early stop codons (Fig 3). *cryaba* mRNA levels  
311 were not different in the *cryaba* null larvae compared to wildtype, nor were they increased in the other  
312 null lines (Fig 7B). Messenger RNA for *cryabb* was reduced in *cryabb* null larvae compared to other  
313 mutant lines (Fig 7C). While delta Cq values for *cryabb* mRNA in *cryabb* null mutants were all lower  
314 than wildtype larvae, this difference was not statistically significant. Messenger RNA levels for *cryabb*  
315 were not statistically significantly increased in *cryaa* or *cryaba* null mutants compared to wildtype  
316 larvae.

317

318

## 319 Discussion

320 We produced mutant zebrafish lines lacking each of the three  $\alpha$ -crystallin proteins. Lack of  $\alpha$ A-  
321 crystallin caused a variety of visible lens defects in mutant larvae not seen, or present at lower  
322 frequency, in wildtype larvae. Lack of either  $\alpha$ B-crystallin did not cause an increase in lens  
323 abnormalities. Loss of  $\alpha$ A-crystallin did not alter overall lens growth, nor significantly disrupt the fiber  
324 cell denucleation important for lens development. Finally, none of the gene knockouts produced  
325 compensatory changes in mRNA levels of the others. These data suggest that loss of  $\alpha$ A-crystallin  
326 makes zebrafish lenses more susceptible to defects in development, but does not always trigger these  
327 defects. Loss of either *cryaba* nor *cryabb* produced no noticeable changes in lens development through  
328 four days of development.

329

330 Our observation of lens abnormalities in our CRISPR-produced *cryaa* null larvae matches previous work  
331 done with a TALEN-produced *cryaa* knockout line (Zou et al., 2015). Lens images from that study  
332 showed central roughness and pitting of the lens, but not the central disorganization, peripheral fiber  
333 cell defects or severe fiber cell boundaries that we found to be characteristic of *cryaa* null larvae. The  
334 proportion of null incross larvae with lens defects in the TALEN study was approximately 85%, a bit  
335 more than our finding of 60%. However, that study separated their phenotypes into “minor” and  
336 “major”, with just over 40% of larvae with minor lens defects. Despite the different methods used to  
337 characterize lens defects in our present study and this past TALEN work, it seems that the observed



338 penetrance of *cryaa* loss is comparable. It is notable that the effects of  $\alpha$ A-crystallin loss can range  
339 from no apparent defect in lens structure to a variety of defects that can occur singly or in  
340 combination. A similar range in lens effects was seen after CRISPR knockout of zebrafish aquaporin 0  
341 paralogs, *mipa* and *mipb* (Vorontsova et al., 2018). Our results suggest that  $\alpha$ A-crystallin is not  
342 essential for proper lens development through 4 days post fertilization, but that its loss does  
343 predispose the lens to defect. The only other model species with an  $\alpha$ A-crystallin knockout line is the  
344 mouse (Brady et al., 1997). Due to the *in utero* development of the mouse, and its pigmentation, it was  
345 likely not feasible to make similar observations of lens development at comparable stages to this study.  
346 However, that study showed that *cryaa* null mice develop cataract by 7 weeks of age, indicating the  
347 protein's importance in lens biology. The impact of *cryaa* loss on zebrafish lens clarity as animals age  
348 can be addressed in the future using our validated lines.

349  
350 The results of CRISPR null mutation, reported here, can be compared to prior knockdowns by  
351 morpholino injection. We previously reported a lack of lens defects in zebrafish larval lenses at 3 dpf  
352 after using a morpholino to block the translation of  $\alpha$ A-crystallin (Posner et al., 2013). Similar results  
353 were reported in a later study (Hinaux et al., 2014). Neither study imaged lenses using DIC microscopy,  
354 so it is possible that defects like those identified in this current study were missed. It is also possible  
355 that small amounts of  $\alpha$ A-crystallin produced during those morpholino experiments were sufficient to  
356 prevent the defects found in this study.

357  
358 Our data do not directly address mechanisms behind the lens defects seen in our *cryaa* null lenses.  
359 Histology and DAPI staining of 3 and 4 dpf larvae indicate that while there may be some delay in fiber  
360 cell denucleation in *cryaa* null lenses, this was found in a small proportion of lenses at 3 dpf and gone  
361 by 4 dpf. Because  $\alpha$ A-crystallin has documented functions as an anti-aggregation chaperone that can  
362 buffer the effects of stress in the lens (Horwitz, 1992), it is possible that its loss may make the lens  
363 more susceptible to protein aggregation. This likely led to the cataract seen in *cryaa* null mouse lenses  
364 (Brady et al., 1997), and since zebrafish  $\alpha$ A-crystallin has chaperone activity (Dahlman et al., 2005;  
365 Koteiche et al., 2015), aggregates in central fiber cells may lead to observed central roughness. This  
366 hypothesis could be tested by future proteomic analysis of insoluble protein. Other defects we  
367 observed hint at a breakdown in normal fiber cell arrangement. Under DIC imaging the fiber cell  
368 borders in the zebrafish lens are visible as regular concentric rings (Fig 1D). Our observation of central  
369 disorganization suggests defects in this cellular arrangement affecting central fiber cells. A separate  
370 defect produced short regions of expanded space between peripheral fiber cells, while least common  
371 were more severe, extended borders between fiber cells. These three anatomical defects were visually  
372 distinct, and may stem from different mechanistic defects in fiber cell interactions. It has been  
373 proposed that  $\alpha$ A-crystallin may play a direct role in fiber cell differentiation (Boyle & Takemoto,  
374 2000). While our *cryaa* null larvae did not show extended defects in fiber cell nucleus degradation,  
375 there may be other aspects of fiber cell differentiation impacted by  $\alpha$ A-crystallin loss.

376  
377 Our finding that lens diameters in *cryaa* null lenses at 3 and 4 dpf were similar to wildtype larvae  
378 matches results of a previous knockout study (Zou et al., 2015). Our *cryaba* and *cryabb* null larvae also  
379 appeared similar in body length and lens diameter to wildtype larvae. We included two separate  
380 samples of wildtype larvae to assess possible variation between breedings or different fish tanks with

381 the same genotype. The statistically significant variation in body length between these two wildtype  
382 samples suggests that variation between groups can be high, and should be taken into account when  
383 looking for changes in lens growth resulting from gene knockout. The observation that lens diameter  
384 was essentially unchanged between 3 and 4 dpf, while body length increased, was unexpected  
385 considering that past studies have found linear relationships between lens diameter and body length,  
386 although these studies did not examine fish prior to 7 dpf (Collery et al., 2014; Wang et al., 2020). It is  
387 possible that in these earlier stages body length and lens diameter growth are not parallel.

388  
389 We found no evidence that mutation of either  $\alpha$ B-crystallin gene in zebrafish caused abnormalities in  
390 lens development or structure. Neither our *cryaba* nor *cryabb* null mutant larvae showed any of the  
391 lens defects above levels seen in wildtype, with the exception of a few more larvae with peripheral  
392 fiber cell defects or severe fiber cell boundaries (Fig 4). This was in contrast to much higher proportions  
393 of all defects, except pitting, in *cryaa* null larvae. Fiber cell denucleation also appeared normal in both  
394  $\alpha$ B-crystallin mutant lines. The lack of developmental lens defects in these fish is consistent with  
395 knockout studies in mouse in which loss of the single  $\alpha$ B-crystallin gene had no effect on lens clarity  
396 through 39 weeks of age, although early developmental stages were not examined (Brady et al., 2001).  
397 However, previously published CRISPR mutants for *cryaba* and *cryabb* did produce lens defects at 4 dpf  
398 in a large proportion of larvae (Mishra et al., 2018). In that study approximately 75% and 50% of *cryaba*  
399 and *cryabb* null larvae, respectively showed lens abnormalities. Defects were categorized as “minor”  
400 and “major” with little description of defect type. Two published images of lenses from a *cryaba*  
401 heterozygote cross show roughness or pitting as well as some gaps between fiber cells. Previous work  
402 by the same lab identified far more severe lens defects in zebrafish larvae after injection of translation-  
403 blocking morpholinos targeting *cryaba* and *cryabb* (Zou et al., 2015). However, general gross defects in  
404 resulting larvae suggest general toxicity from the morpholinos and not a lens specific effect. In their  
405 more recent CRISPR lines there were no reported general larval defects, further suggesting that the  
406 morpholino-induced lens defects were not specifically due to the loss of  $\alpha$ B-crystallin proteins.

407  
408 Existing data suggest that neither *cryaba* nor *cryabb* are significantly expressed in the zebrafish lens  
409 through 5 dpf, based on shotgun proteomics (Greiling, Houck & Clark, 2009) and single cell RNA-Seq  
410 (Farnsworth, Posner & Miller, 2021). These previous findings might explain the lack of noticeable early  
411 lens phenotypes in our  $\alpha$ B-crystallin homozygous null larvae. The reason for the discrepancy in our  
412 present CRISPR work and a past study (Mishra et al., 2018) is unclear. Our mass spectrometry data  
413 indicated a loss of  $\alpha$ Ba- and  $\alpha$ Bb-crystallin in our null adult lenses, so our lack of a phenotype does not  
414 appear to be the result of residual protein. We did detect some residual peptides from these crystallins  
415 during our analysis, but these were attributed to carry over on the chromatography column during the  
416 highly sensitive parallel reaction monitoring analysis. It is possible that the difference in results is due  
417 to variation in the background genetics of the zebrafish lines used. We show in this study that different  
418 populations of wildtype fish can produce larvae with different lengths and lens diameters (Fig 5), and  
419 we see variable, low levels of lens defects in wildtype larvae between breedings. This variation could  
420 contribute to differences between studies.

421  
422 The variety of approaches used to produce  $\alpha$ A-crystallin mutants in this study allows us to compare  
423 their utility for studying resulting phenotypes. The quickest way to screen genes for their role in

424 development is to directly examine larvae injected at the zygote state. There is good evidence that this  
425 approach is effective when injecting a mix of four gRNAs (Wu et al., 2018). In our own hands we found  
426 this approach effective when targeting genes already known to play an essential role in lens  
427 development. For example, injection of a four gRNA mix (pgRNA) targeting the transcription factor  
428 *foxe3* closely replicated phenotypes reported in a stable zebrafish null line (Supplemental Fig 1; (Krall &  
429 Lachke, 2018)). However, when targeting *cryaa* this approach did not produce similar levels of  
430 phenotypes seen in our null line (Fig 4). The proportion of each defect differed between the two  
431 approaches, and the levels of some defects also differed between 3 and 4 dpf. These variations in  
432 phenotype could be due to the mosaic nature of gRNA injected larvae, in which some lens cells contain  
433 mutant *cryaa* alleles and others contain wildtype alleles. The expression of  $\alpha$ A-crystallin in unaffected  
434 cells may be enough to prevent the defects seen in our null line. We previously showed that adult  
435 zebrafish lenses produce less  $\alpha$ A-crystallin than mammalian lenses (Posner et al., 2008), and our past  
436 qPCR and single cell RNA-Seq data suggest that lens *cryaa* expression through 5 dpf is relatively low as  
437 well (Posner et al., 2017; Farnsworth, Posner & Miller, 2021). Since the complete loss of  $\alpha$ A-crystallin in  
438 our *cryaa* null line only led to visible defects in 60% of larvae, the expression of reduced amounts in our  
439 injected embryos may be sufficient to alter the phenotype. It is also possible that differences are  
440 simply due to the stochastic nature of phenotype development. Considering the dynamic changes  
441 occurring in the zebrafish lens between 3 and 4 dpf it is best to quantify phenotypes for each day  
442 separately in future studies.

443  
444 Because our initial *cryaa* null line generated with a single gRNA and containing a frame shift mutation  
445 stopped breeding, we took the opportunity to generate a second null line with a large deletion  
446 removing the proximal promoter region and start codon. Both lines generated similar lens defects,  
447 reinforcing the conclusion that these defects resulted from the loss of  $\alpha$ A-crystallin and not off-target  
448 effects. There are two other benefits to generating mutant knockout alleles by deletion. First, these  
449 deletion alleles are simpler to screen, as they are identifiable by PCR without subsequent sequencing.  
450 Second, deletion of the promoter and start codon reduces the chance of possible genetic  
451 compensation after nonsense mediated mRNA decay (El-Brolosy et al., 2019). The loss of the targeted  
452 gene's mRNA can also be monitored by qPCR (Fig 7). Our two  $\alpha$ B-crystallin null lines were produced  
453 with single gRNAs and frame shift mutations. While our proteomics work confirmed loss of each  
454 protein in our null adult fish lenses, qPCR showed reduction in *cryabb* mRNA in the *cryabb* null line, but  
455 no reduction in *cryaba* mRNA in the *cryaba* null line. This difference may reflect the unpredictability of  
456 non-sense mediated decay, and shows that mRNA levels do not necessarily reflect eventual protein  
457 levels. It is also possible that this difference in mRNA levels reflects primer location, as our *cryaba* qPCR  
458 primers annealed within exon 1, just downstream of the gRNA target site, while our *cryabb* primers  
459 annealed to the 5' UTR.

460  
461 Several key questions remain unanswered in this study. It is unclear how the loss of  $\alpha$ A-crystallin leads  
462 to the visual defects observed by DIC microscopy. Lenses from mutant and knockout  $\alpha$ -crystallin mice  
463 have been analyzed by proteomics and RNA-Seq to identify changes in global gene expression (Andley  
464 et al., 2013, 2018). A similar approach would be valuable with our zebrafish null lines. We have only  
465 presented data through 7 dpf. It will be interesting to see how  $\alpha$ A-crystallin loss impacts lens clarity  
466 and optics as fish age. While we know that both  $\alpha$ B-crystallin genes are expressed in the adult lens, we

467 do not know at what age this expression begins, and how  $\alpha$ B-crystallin loss may impact lenses as they  
468 age. This question is particularly interesting as *cryaba* is lens specific in adults while *cryabb* is expressed  
469 broadly, suggesting an ontogenetic shift in the function of these genes and their proteins. Why *cryaba*  
470 is expressed outside the lens in early development, and whether it or *cryabb* plays an important  
471 developmental role in those extralenticular tissues, is also unknown. Answers to these questions would  
472 add to the understanding of why these small heat shock protein genes were co-opted as key players  
473 during vertebrate lens evolution.

474

475

## 476 **Acknowledgements**

477

478 We would like to thank the many members of the zebrafish research community who were helpful  
479 with technical suggestions. The plasmid-free protocol used to generate gRNAs was shared with us by  
480 Dr. Cody Smith at the University of Notre Dame. Dr. Jennifer Phillips at the University of Oregon first  
481 suggested our double gRNA deletion approach for generating our *cryaa* mutant. Caitlin Puff  
482 contributed to the measurements of larval body length and lens diameters. This work was supported  
483 by the NIH National Eye Institute (R15 EY13535) to MP, by the Provost Office at Ashland University's  
484 (AU) student research grant program and by the AU Choose Ohio First program that provided summer  
485 research support to KM. Mass spectrometric analysis was supported by the NIH National Institute (P30  
486 EY010572).

487

488

489 **Citations**

490  
491

- 492 Andley UP, Malone JP, Hamilton PD, Ravi N, Townsend RR. 2013. Comparative Proteomic Analysis  
493 Identifies Age-Dependent Increases in the Abundance of Specific Proteins after Deletion of the  
494 Small Heat Shock Proteins  $\alpha$ A- and  $\alpha$ B-Crystallin. *Biochemistry* 52:2933–2948. DOI:  
495 10.1021/bi400180d.
- 496 Andley UP, Tycksen E, McGlasson-Naumann BN, Hamilton PD. 2018. Probing the changes in gene  
497 expression due to  $\alpha$ -crystallin mutations in mouse models of hereditary human cataract. *PLoS ONE*  
498 13:e0190817-18. DOI: 10.1371/journal.pone.0190817.
- 499 Bova MP, Yaron O, Huang Q, Ding LL, Haley DA, Stewart PL, Horwitz J. 1999. Mutation R120G in alphaB-  
500 crystallin, which is linked to a desmin-related myopathy, results in an irregular structure and  
501 defective chaperone-like function. *Proceedings of the National Academy of Sciences of the United*  
502 *States of America* 96:6137–6142.
- 503 Boyle DL, Takemoto LJ. 2000. A possible role for alpha-crystallins in lens epithelial cell differentiation.  
504 *Molecular vision* 6:63–71.
- 505 Brady JP, Garland D, Duglas-Tabor Y, Robison WG, Groome A, Wawrousek EF. 1997. Targeted  
506 disruption of the mouse alpha A-crystallin gene induces cataract and cytoplasmic inclusion bodies  
507 containing the small heat shock protein alpha B-crystallin. *Proceedings of the National Academy of*  
508 *Sciences of the United States of America* 94:884–889.
- 509 Brady JP, Garland DL, Green DE, Tamm ER, Giblin FJ, Wawrousek EF. 2001. AlphaB-crystallin in lens  
510 development and muscle integrity: a gene knockout approach. *Investigative ophthalmology & visual*  
511 *science* 42:2924–2934.
- 512 Bustin SA, Benes V, Garson JA, Hellemans J, Huggett J, Kubista M, Mueller R, Nolan T, Pfaffl MW,  
513 Shipley GL, Vandesompele J, Wittwer CT. 2009. The MIQE guidelines: minimum information for  
514 publication of quantitative real-time PCR experiments.
- 515 Collery RF, Veth KN, Dubis AM, Carroll J, Link BA. 2014. Rapid, Accurate, and Non-Invasive  
516 Measurement of Zebrafish Axial Length and Other Eye Dimensions Using SD-OCT Allows  
517 Longitudinal Analysis of Myopia and Emmetropization. *PLoS ONE* 9:e110699. DOI:  
518 10.1371/journal.pone.0110699.
- 519 Dahlman JM, Margot KL, Ding L, Horwitz J, Posner M. 2005. Zebrafish alpha-crystallins: protein  
520 structure and chaperone-like activity compared to their mammalian orthologs. *Molecular vision*  
521 11:88–96.



- 522 El-Brolosy MA, Kontarakis Z, Rossi A, Kuenne C, Günther S, Fukuda N, Kikhi K, Boezio GLM, Takacs CM,  
523 Lai S-L, Fukuda R, Gerri C, Giraldez AJ, Stainier DYR. 2019. Genetic compensation triggered by  
524 mutant mRNA degradation. *Nature*:1–26. DOI: 10.1038/s41586-019-1064-z.
- 525 Farnsworth D, Posner M, Miller A. 2021. Single cell transcriptomics of the developing zebrafish lens and  
526 identification of putative controllers of lens development. *Experimental Eye Research*:108535. DOI:  
527 10.1016/j.exer.2021.108535.
- 528 Greiling TMS, Aose M, Clark JI. 2010. Cell fate and differentiation of the developing ocular lens.  
529 *Investigative ophthalmology & visual science* 51:1540–1546. DOI: 10.1167/iovs.09-4388.
- 530 Greiling TMS, Houck SA, Clark JI. 2009. The zebrafish lens proteome during development and aging.  
531 *Molecular vision* 15:2313–2325.
- 532 Hinaux H, Blin M, Fumey J, Legendre L, Heuzé A, Casane D, Rétaux S. 2014. Lens defects in *Astyanax*  
533 *mexicanus* Cavefish: Evolution of crystallins and a role for alphaA-crystallin. *Developmental*  
534 *neurobiology*:n/a-n/a. DOI: 10.1002/dneu.22239.
- 535 Horwitz J. 1992. Alpha-crystallin can function as a molecular chaperone. *Proceedings of the National*  
536 *Academy of Sciences of the United States of America* 89:10449–10453.
- 537 Koteiche HA, Claxton DP, Mishra S, Stein RA, McDonald ET, McHaourab HS. 2015. Species-Specific  
538 Structural and Functional Divergence of  $\alpha$ -Crystallins: Zebrafish  $\alpha$ Ba- and Rodent  $\alpha$ A ins-Crystallin  
539 Encode Activated Chaperones. *Biochemistry* 54:5949–5958. DOI: 10.1021/acs.biochem.5b00678.
- 540 Krall M, Lachke SA. 2018. A zebrafish model of foxe3 deficiency demonstrates lens and eye defects  
541 with dysregulation of key genes involved in cataract formation in humans. *Human genetics*  
542 137:315–328. DOI: 10.1007/s00439-018-1884-1.
- 543 Mishra S, Wu S-Y, Fuller AW, Wang Z, Rose KL, Schey KL, McHaourab HS. 2018. Loss of  $\alpha$ B-crystallin  
544 function in zebrafish reveals critical roles in the development of the lens and stress resistance of the  
545 heart. *The Journal of biological chemistry* 293:740–753. DOI: 10.1074/jbc.m117.808634.
- 546 Pino LK, Searle BC, Bollinger JG, Nunn B, MacLean B, MacCoss MJ. 2020. The Skyline ecosystem:  
547 Informatics for quantitative mass spectrometry proteomics. *Mass Spectrometry Reviews* 39:229–  
548 244. DOI: 10.1002/mas.21540.
- 549 Posner M, Hawke M, Lacava C, Prince CJ, Bellanco NR, Corbin RW. 2008. A proteome map of the  
550 zebrafish (*Danio rerio*) lens reveals similarities between zebrafish and mammalian crystallin  
551 expression. *Molecular vision* 14:806–814.
- 552 Posner M, Murray KL, McDonald MS, Eighinger H, Andrew B, Drossman A, Haley Z, Nussbaum J, David  
553 LL, Lampi KJ. 2017. The zebrafish as a model system for analyzing mammalian and native  $\alpha$ -crystallin  
554 promoter function. *PeerJ* 5:e4093-27. DOI: 10.7717/peerj.4093.

- 555 Posner M, Skiba J, Brown M, Liang JO, Nussbaum J, Prior H. 2013. Loss of the small heat shock protein  
556  $\alpha$ A-crystallin does not lead to detectable defects in early zebrafish lens development. *Experimental*  
557 *Eye Research*. DOI: 10.1016/j.exer.2013.09.007.
- 558 R Core Team. 2021.R: A language and environment for statistical computing. R Foundation for  
559 Statistical Computing, Vienna, Austria. URL <https://www.R-project.org/>
- 560 R Studio Team. 2020. RStudio: Integrated Development for R. RStudio, PBC, Boston, MA URL  
561 <http://www.rstudio.com/>
- 562 Smith AA, Wyatt K, Vacha J, Vihtelic TS, Zigler JS, Wistow GJ, Posner M. 2006. Gene duplication and  
563 separation of functions in alphaB-crystallin from zebrafish (*Danio rerio*). *The FEBS journal* 273:481–  
564 490. DOI: 10.1111/j.1742-4658.2005.05080.x.
- 565 Srinivasan AN, Nagineni CN, Bhat SP. 1992. alpha A-crystallin is expressed in non-ocular tissues. *The*  
566 *Journal of biological chemistry* 267:23337–23341.
- 567 Vorontsova I, Gehring I, Hall JE, Schilling TF. 2018. Aqp0a Regulates Suture Stability in the Zebrafish  
568 Lens. *Investigative ophthalmology & visual science* 59:2869–11. DOI: 10.1167/iovs.18-24044.
- 569 Wang K, Vorontsova I, Hoshino M, Uesugi K, Yagi N, Hall JE, Schilling TF, Pierscionek BK. 2020. Optical  
570 development in the zebrafish eye lens. *FASEB journal : official publication of the Federation of*  
571 *American Societies for Experimental Biology* 95:399–11. DOI: 10.1096/fj.201902607r.
- 572 Wu RS, Lam II, Clay H, Duong DN, Deo RC, Coughlin SR. 2018. A Rapid Method for Directed Gene  
573 Knockout for Screening in G0 Zebrafish. *Developmental Cell* 46:112-125.e4. DOI:  
574 10.1016/j.devcel.2018.06.003.
- 575 Zou P, Wu S-Y, Koteiche HA, Mishra S, Levic DS, Knapik E, Chen W, McHaourab HS. 2015. A conserved  
576 role of  $\alpha$ A-crystallin in the development of the zebrafish embryonic lens. *Experimental Eye Research*  
577 138:104–113. DOI: 10.1016/j.exer.2015.07.001.

578

## Figure 1

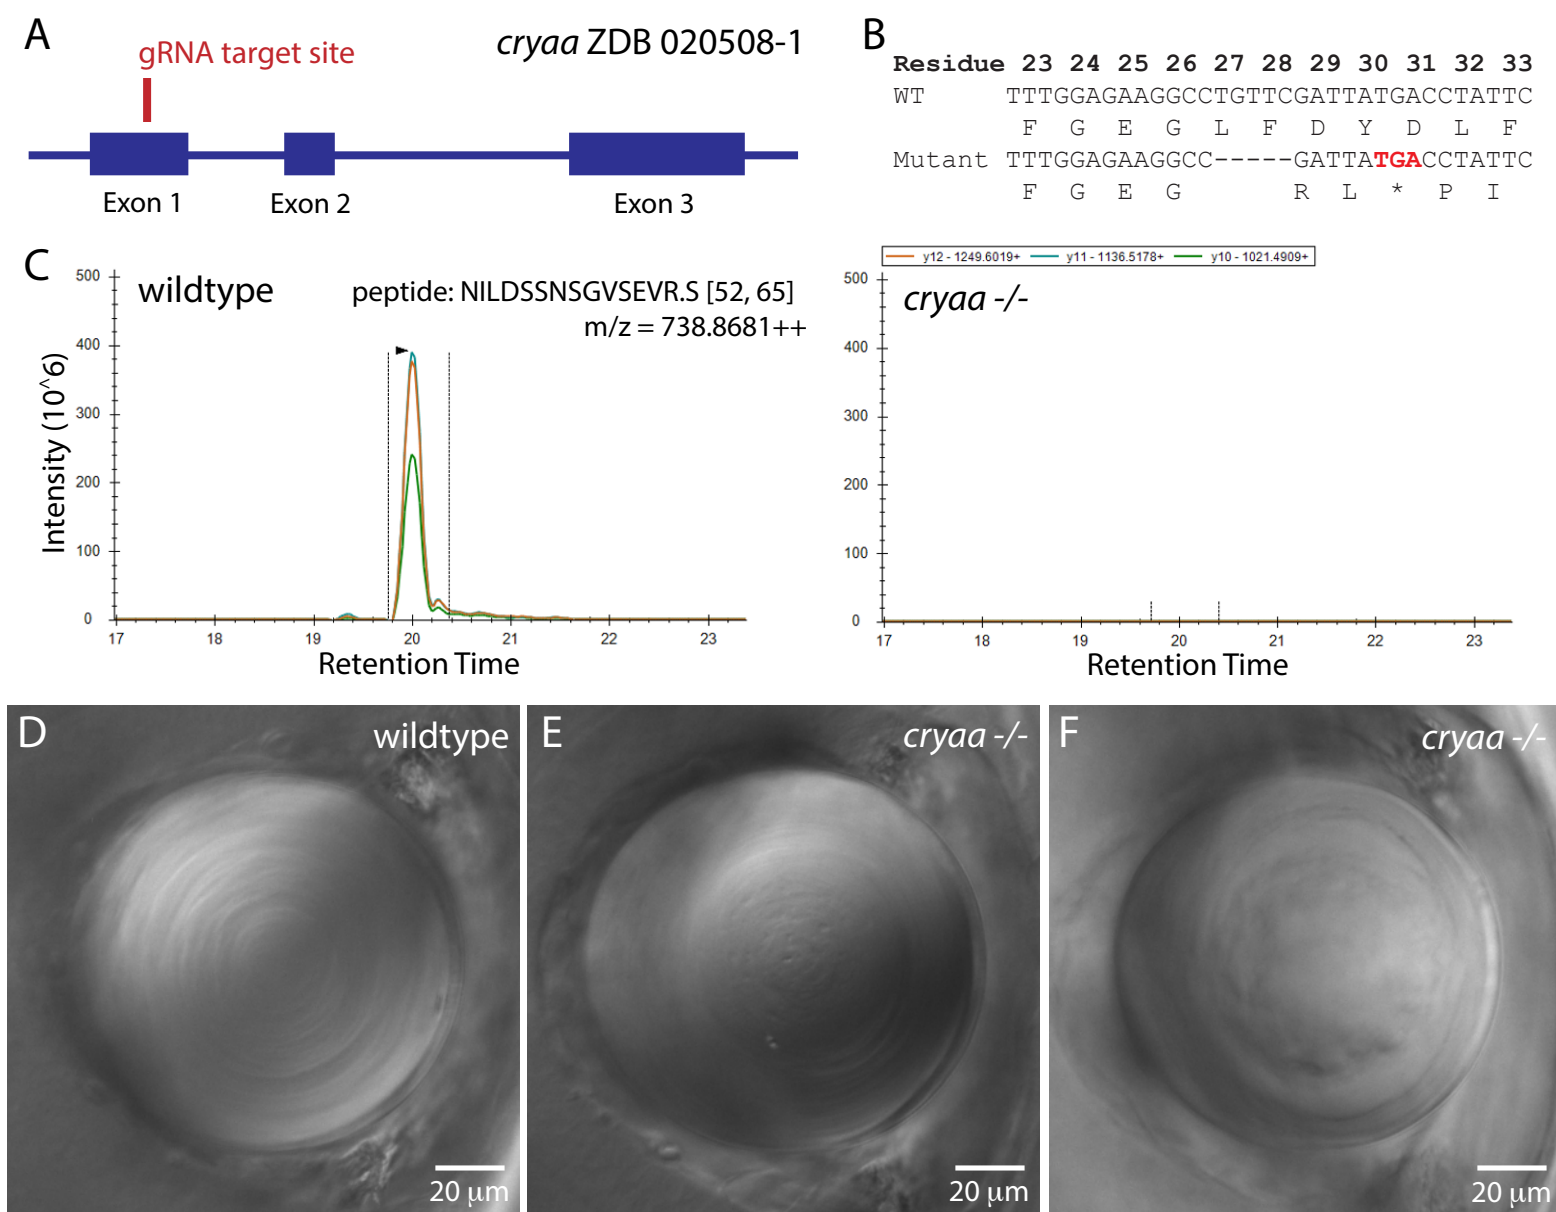

**Figure 1. *cryaa* null mutant.** Produced with a single gRNA to generate a five basepair deletion and frame shift mutation in exon 1, with relative position noted by red line (A). Injected embryos were outcrossed to wildtype fish to identify heterozygote mutants, with a five basepair deletion allele identified that leads to an early stop codon after amino acid 28 (B). Incrossed heterozygotes were used to generate a homozygous null line, which was bred to assess the effects of *cryaa* loss. Mass spectrometry confirmed that embryos generated by incrossing this null line produced no detectable alpha A crystallin protein (C). Parallel reaction monitoring of the 3 major fragment ions of the +3 charge state of *cryaa* peptide 52-65 from the digest of wildtype lenses showed coelution of its three major fragment ions on the left and no corresponding peaks in the digest from KO lenses on the right (C). Compared to wildtype lenses at 3 dpf (D), *cryaa* null embryos showed various defects such as roughness in the primary fiber cell region (E) and a general disorganization of central fiber cells (F). Lenses are from 3 dpf embryos, imaged using DIC optics and arranged with retina to the left. Scale bars are 20 microns.

## Figure 2

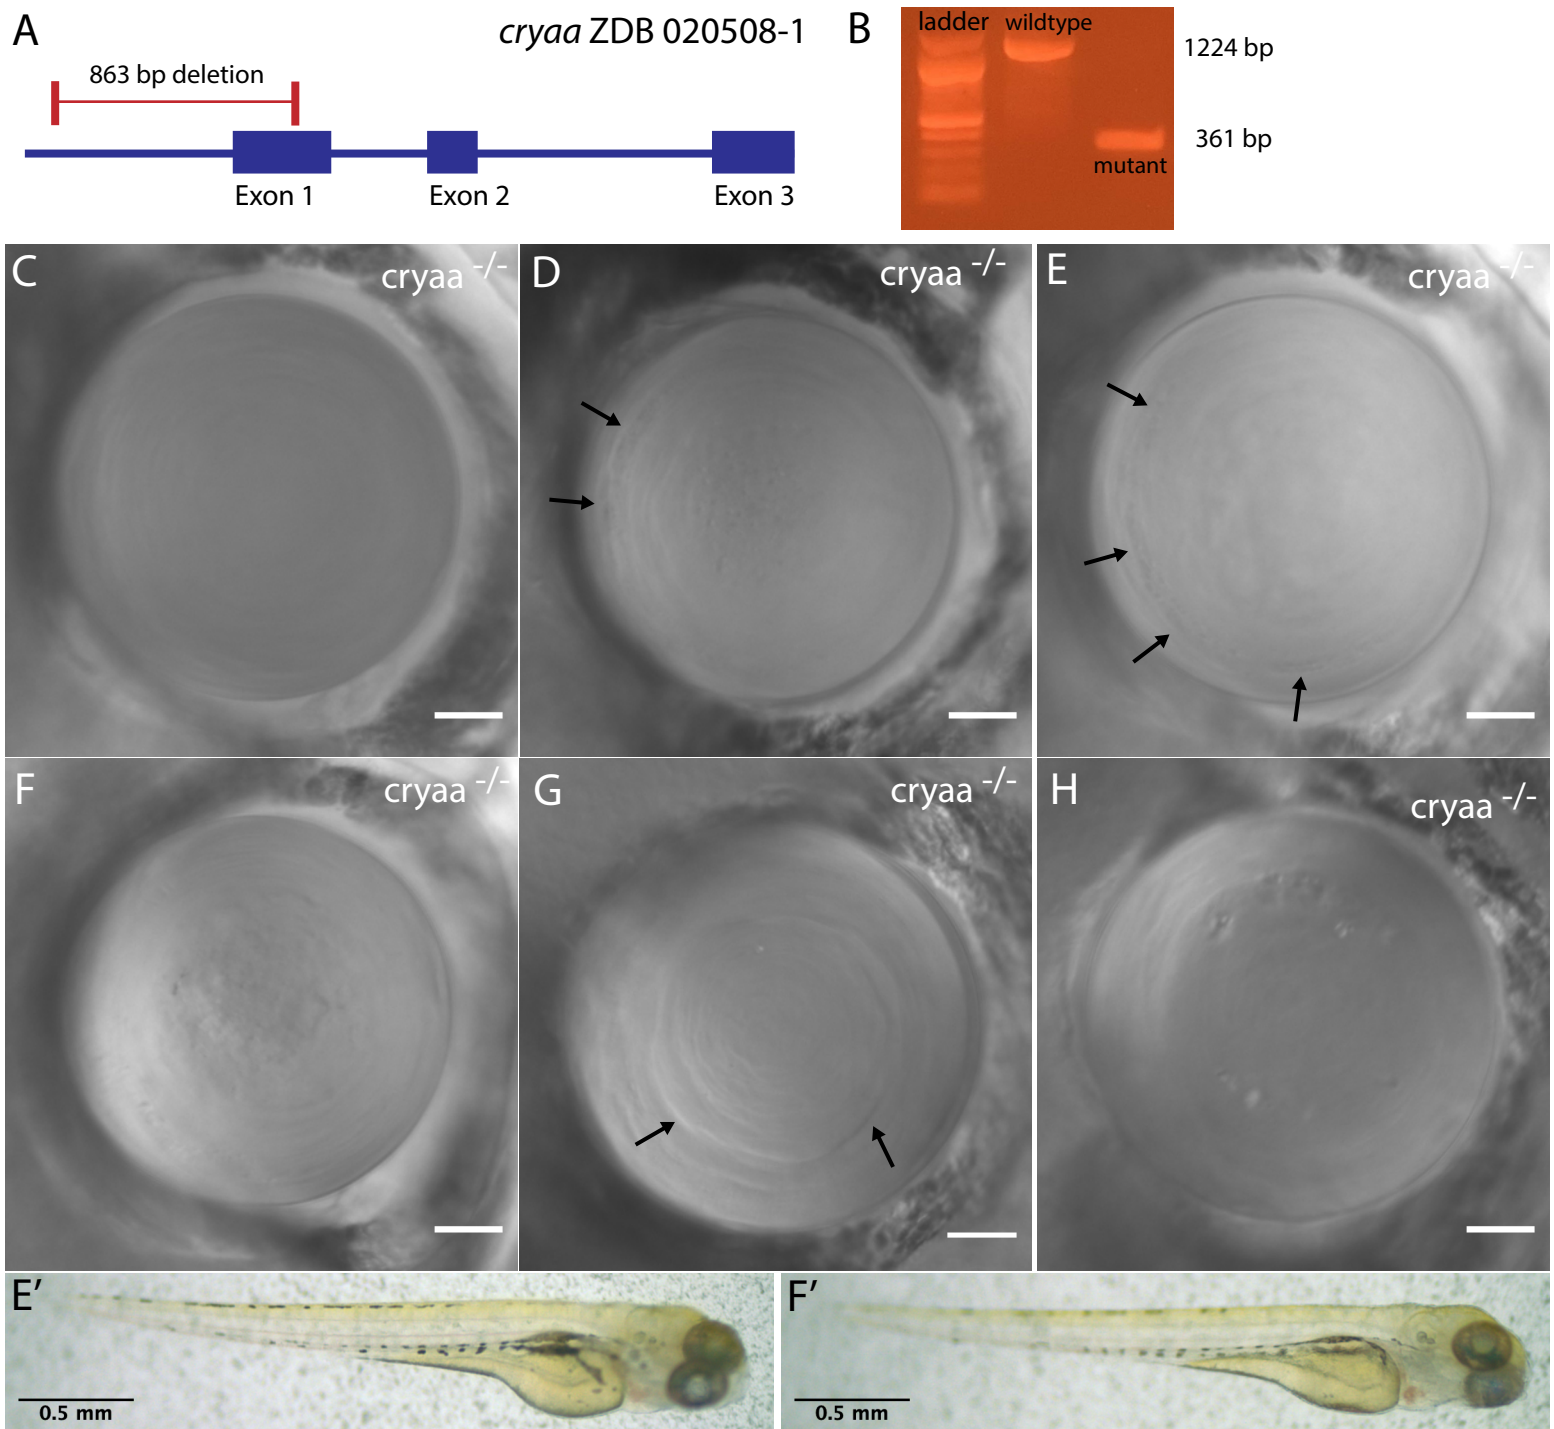

**Figure 2. Second *cryaa* null mutant line generated by deleting start codon and proximal promoter region produced variable lens phenotypes.** Two gRNAs were designed to remove approximately 860 basepairs of the *cryaa* gene (A). This large deletion could be easily identified using PCR amplification with primers flanking the gRNA target regions (B). Some *cryaa* null embryos showed visually normal lenses by DIC imaging (C). Typical phenotypes in abnormal lenses included roughness in central primary fiber cells (D), and general disorganization of central fiber cells (E), as seen in our single gRNA null mutant (Figure 1). Gaps or pits between peripheral fiber cells were also common (D and E: arrows). Some lenses combined several of these phenotypes (F). We also saw lenses with severe boundaries between fiber cells (G: arrows) and pitting (H). Lenses shown are either 3 or 4 dpf and arranged with retina to the left. Scale bars are 20 microns. Matching embryos for lenses E and F are shown to indicate lack of general morphological defects (E' and F').





## Figure 4

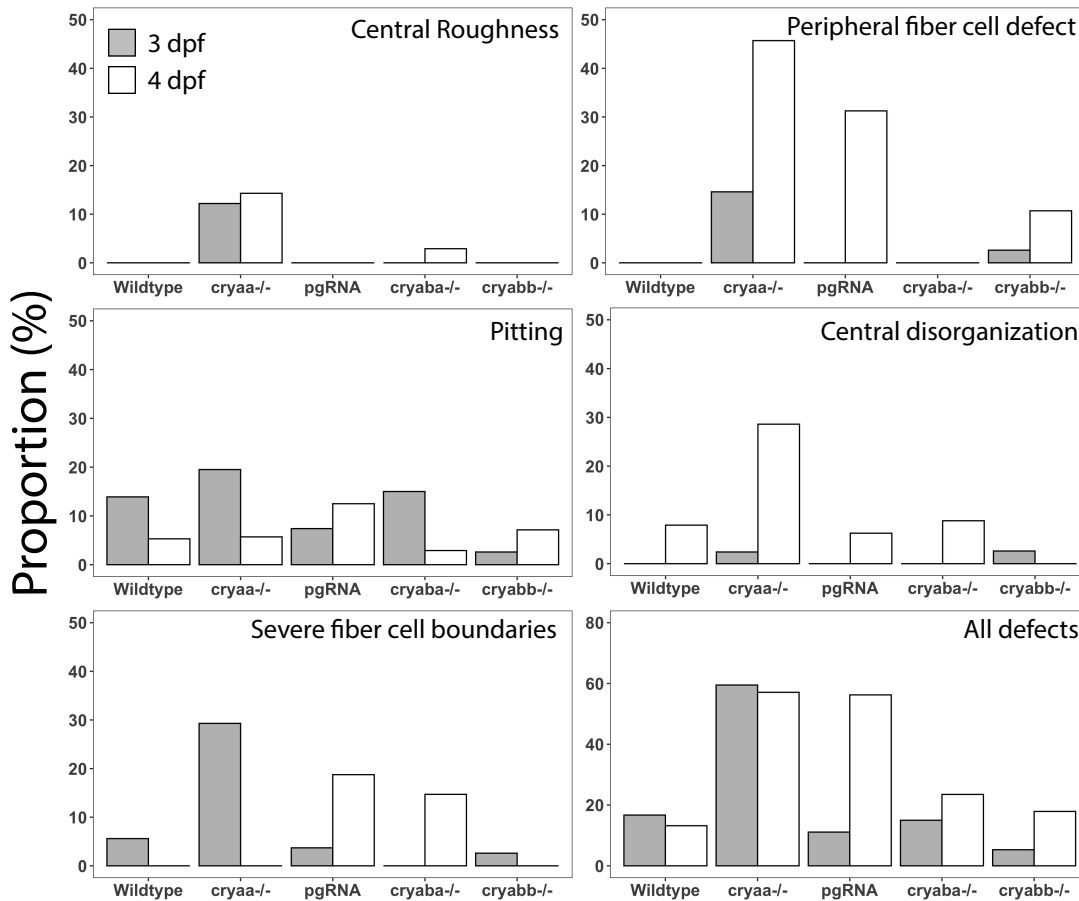

**Figure 4. Prevalence of different lens abnormalities in wildtype,  $\alpha$ -crystallin knockout and *cryaa* gRNA injected larvae at 3 and 4 dpf.** Each graph shows the proportion of larvae with that defect type. Larvae examined at 3 and 4 dpf, respectively were wildtype (n= 36/38), offspring of homozygous null mutants for *cryaa* (n=41/35), *cryaba* (n=40/34) and *cryabb* (n=38/28), and embryos injected with a four-gRNA mix targeting the *cryaa* gene (pgRNA; n=27/16).

## Figure 5

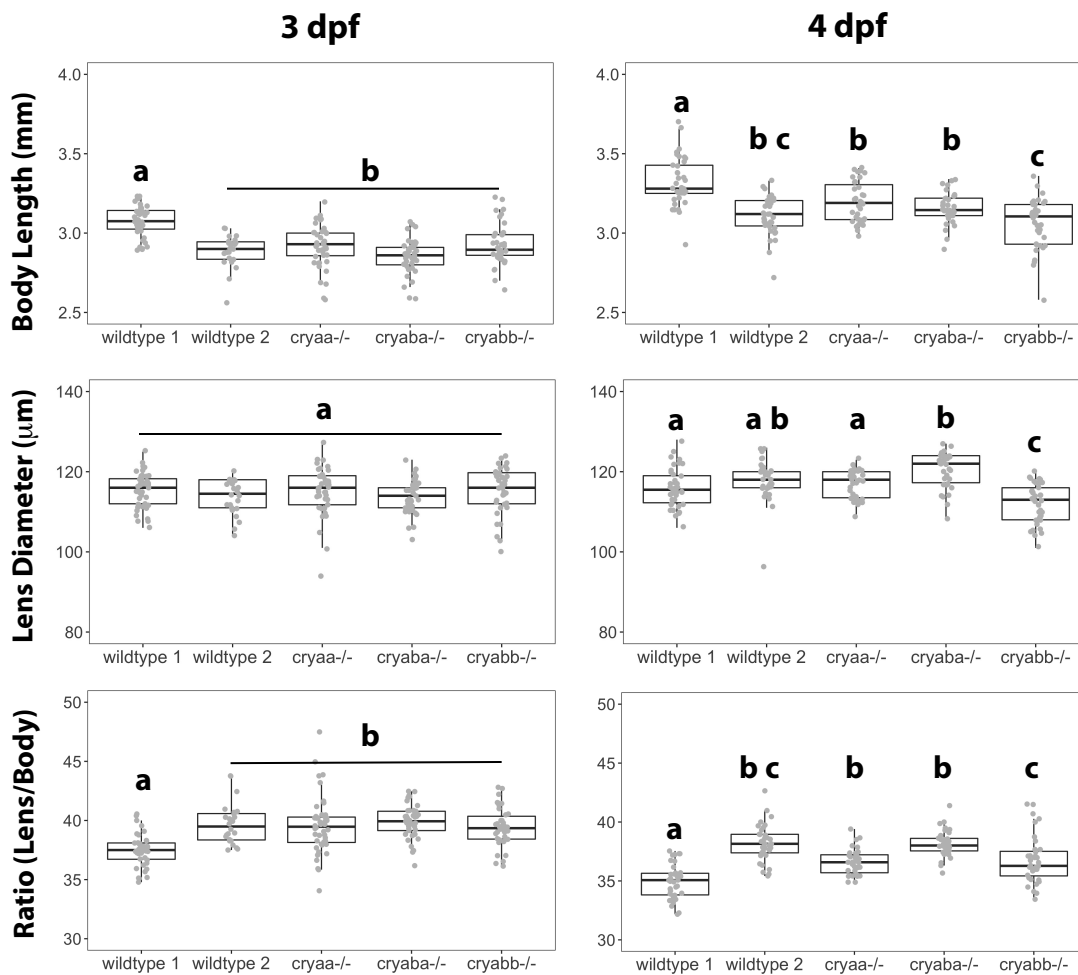

**Figure 5. Comparison of lens diameters and body lengths between wildtype and  $\alpha$ -crystallin knockout embryos.** Box and whisker plots show measurements at 3 and 4 days post fertilization. Analysis of variance with Tukey post test was used to identify statistically significant differences between groups. Letters indicate statistical groups within each panel.

## Figure 6

3 dpf

4 dpf

Wildtype

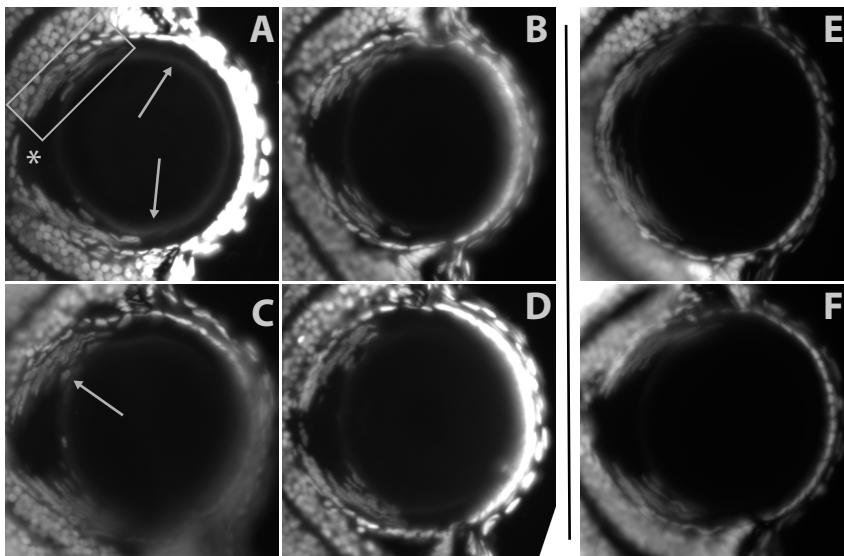

*cryaa* null

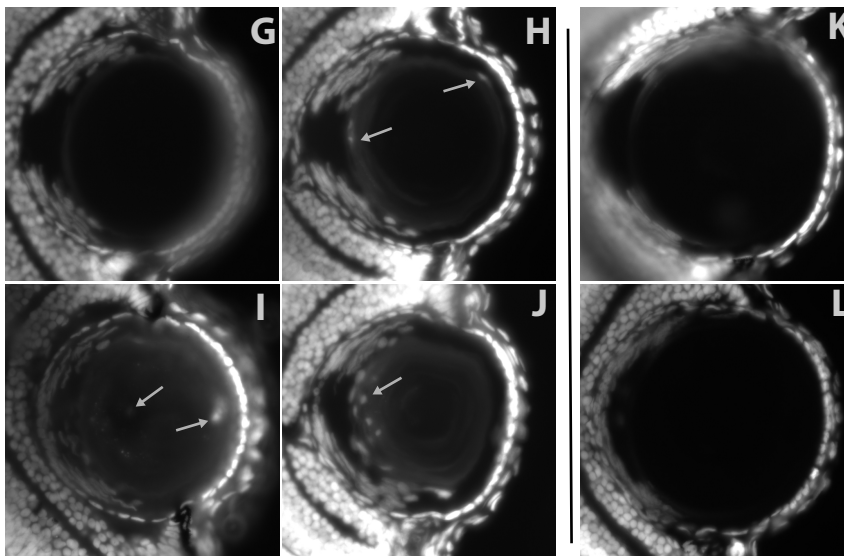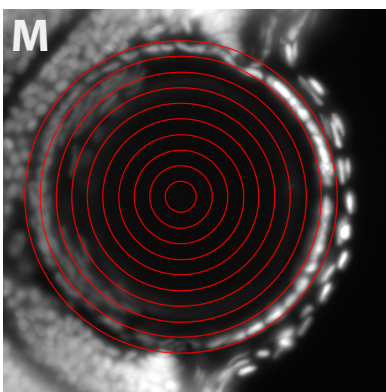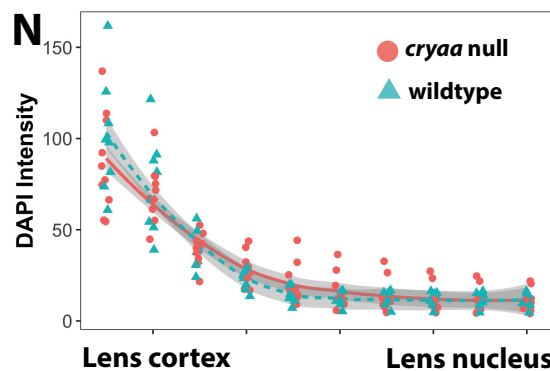

**Figure 6. Cryosectioned lenses at 3 and 4 dpf stained with DAPI to assess clearance of fiber cell nuclei.** Four representative lenses are shown for wildtype (A-D) and the *cryaa* null line (G-J) at 3 dpf, and two representative lenses at 4 dpf (E-F; K-L). Most images were taken at 200X total magnification, with some taken at 100X to capture more lens cell nuclei in one focal plane. Retina is oriented to the left in each image, with cornea to the right. The four images at 3 dpf for each genotype demonstrate the range of phenotypes found, with the top left panel the most normal and bottom right the most abnormal. Rectangle in panel A highlights one of two regions of flattened, extended fiber cell nuclei at retinal side of the lens, separated by a nucleus free zone at \*. Arrows indicate details described in the results section. Concentric circles were used to measure average pixel density of DAPI staining across the lens (see M as an example). While some *cryaa* null lenses showed higher DAPI intensity in inner areas of the lens at 3 dpf (N), these differences were not statistically significant (Mann-Whitney U test).

## Figure 7

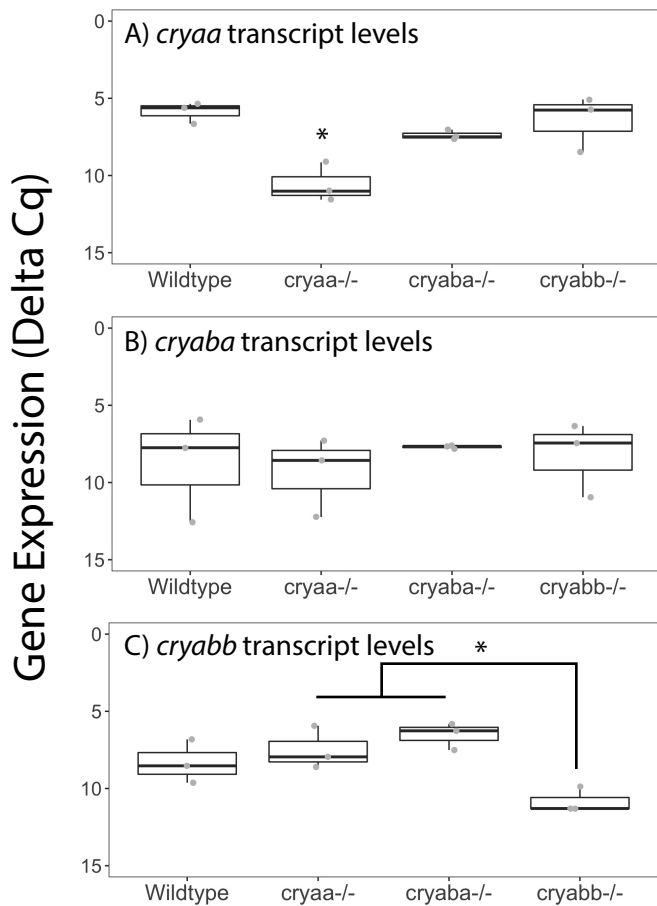

**Figure 7. Expression of each  $\alpha$ -crystallin gene assayed by qPCR in whole bodies of wildtype and mutant larvae at 7 dpf.** Box and whisker plots show delta Cq values generated with primers for *cryaa* (A), *cryaba* (B) and *cryabb* (C) in three biological replicates of the genotypes indicated on the x-axes. Y-axes are inverted as lower delta Cq values indicate greater expression. Asterisks indicate statistically significant differences based on ANOVA with Tukey post test ( $p$ -value < 0.05).
