# Supplementary material for: Effects of α-crystallin gene knockout on zebrafish lens development
Source: bioRxiv or medRxiv preprint supplement (doi:10.1101/2021.12.22.473921), 2022-09-27
Supplement: Supplementary file [file media-3.pdf]

## Supplementary Figure 3

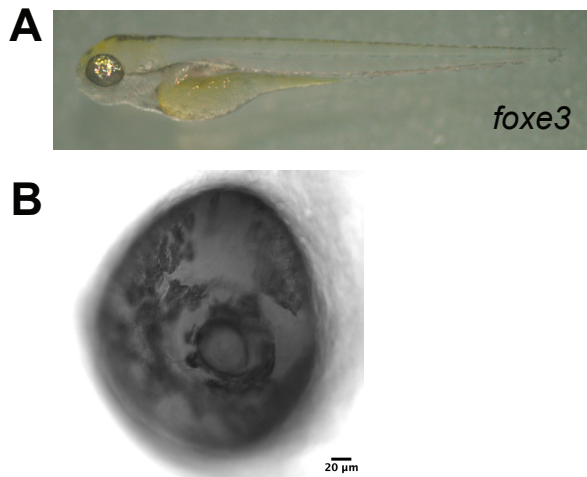

**Supplementary Figure 3.** Effects of injecting a four gRNA mix targeting *foxe3*. Injected crispant fish at 3 dpf showing lack of a pupil characteristic of a previously reported phenotype from *foxe3* null larvae (A; Krall and Lachke 2018). Lens from *foxe3* crispant larva showing severe eye phenotype with DIC optics (B). The narrowing of the pupil makes it difficult to see the edges of the lens.
